# Supplementary material for: Identifying the seeding signature in cloud particles from hydrometeor residuals
Source: Copernicus journal article supplement (doi:10.5194/amt-17-2387-2024), 2024-04-19
Supplement: Supplementary file 1 [file amt-17-2387-2024-supplement.pdf]

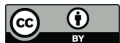

*Supplement of*

## **Identifying the seeding signature in cloud particles from hydrometeor residuals**

**Mahen Konwar et al.**

*Correspondence to:* Mahen Konwar (mkonwar@tropmet.res.in)

The copyright of individual parts of the supplement might differ from the article licence.

1  
2

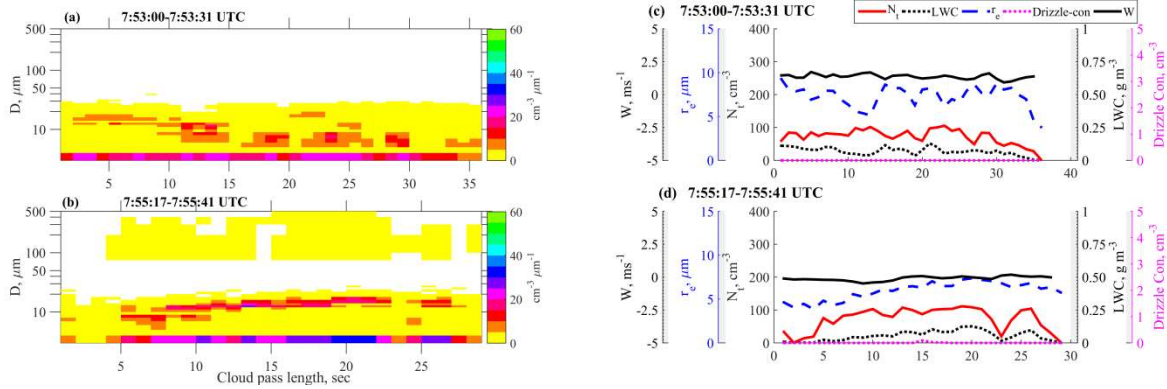

3  
4  
5  
6  
7  
8  
9

**Figure S1.** Drop size distribution for non-seeded cloud (NSCI) on 21 August 2019. The effective radius ( $r_e$ ,  $\mu\text{m}$ ), vertical velocity ( $W$ ,  $\text{ms}^{-1}$ ), total droplet number concentrations ( $N_t$ ,  $\text{cm}^{-3}$ ) in the diameter range 2-50  $\mu\text{m}$ , and drizzle concentration (Drizzle con,  $\text{cm}^{-3}$ ) in the diameter range 100-6200  $\mu\text{m}$ , and liquid water content (LWC) are shown for cloud passes.

10

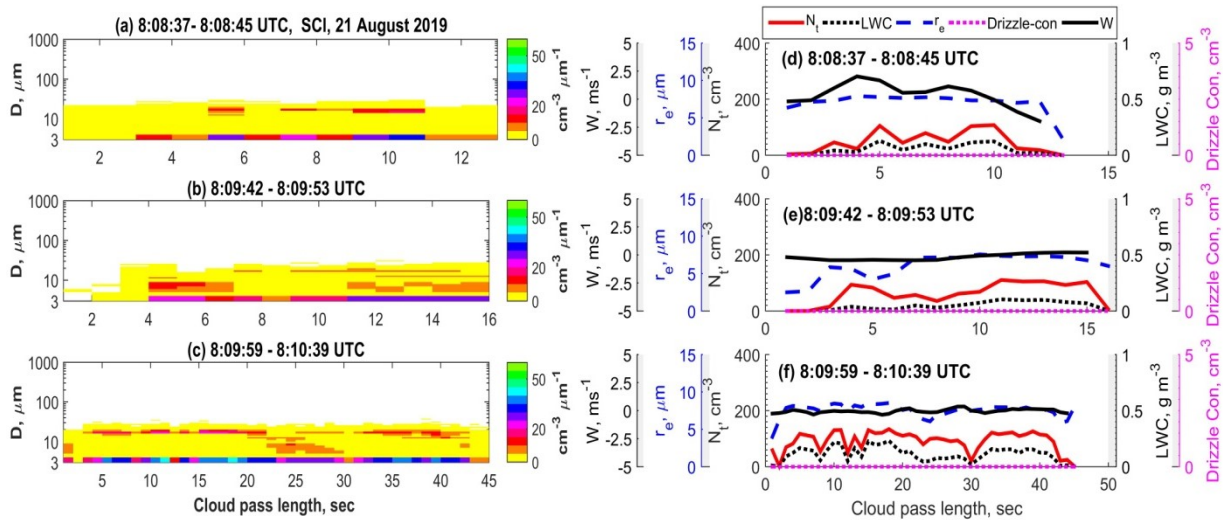

11  
12  
13  
14

**Figure S2.** Same as Figure S1, but for seeded cloud on 21 August 2019.

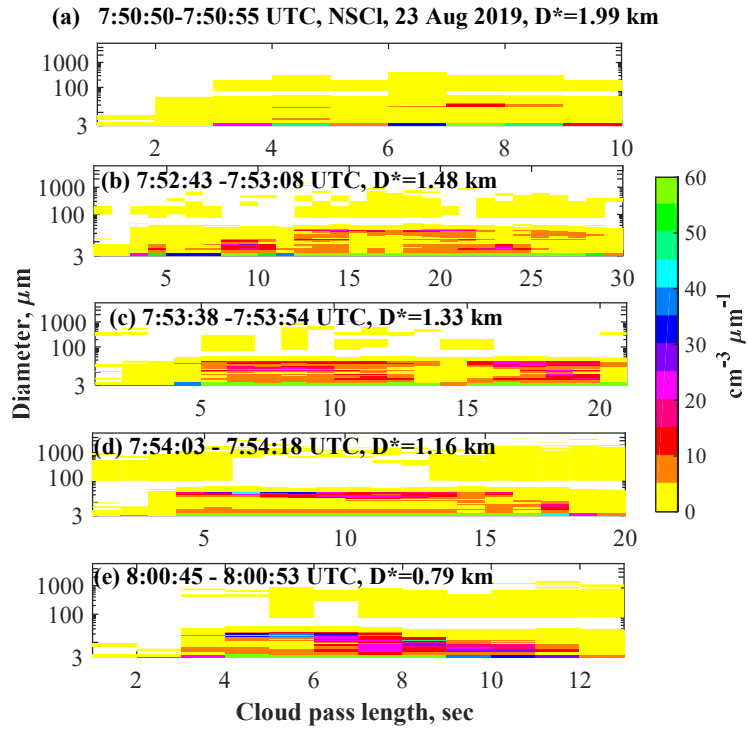

15

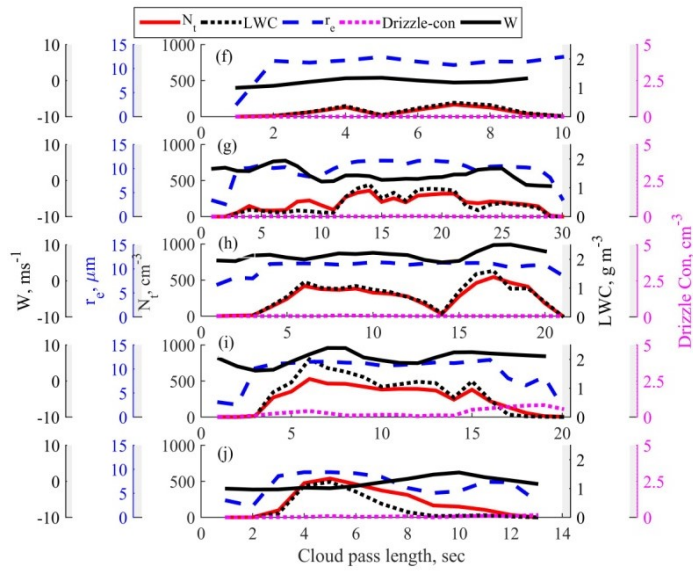

16

17

18 **Figure S3.** Same as Figure S1 but for NSCI on 23 Aug 2019.

19

20

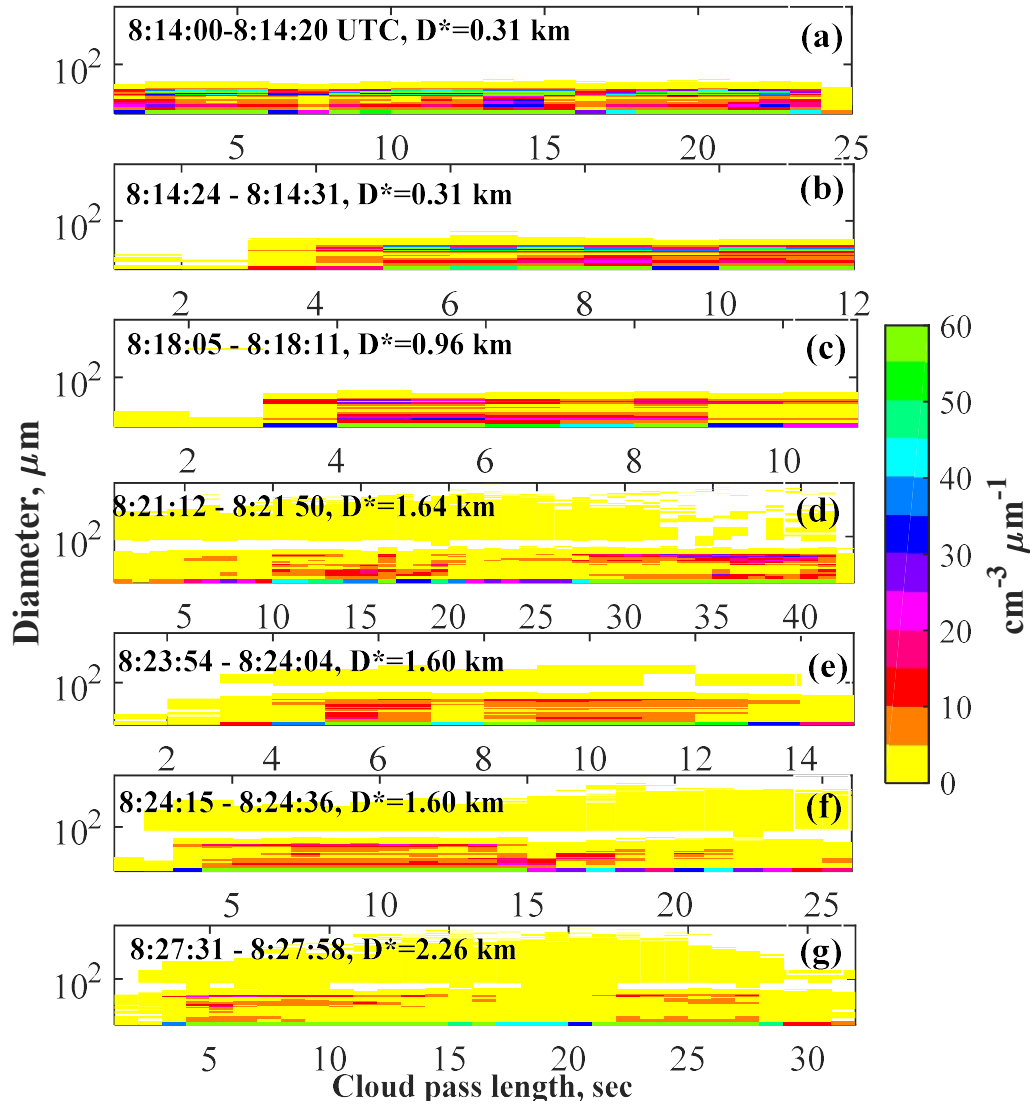

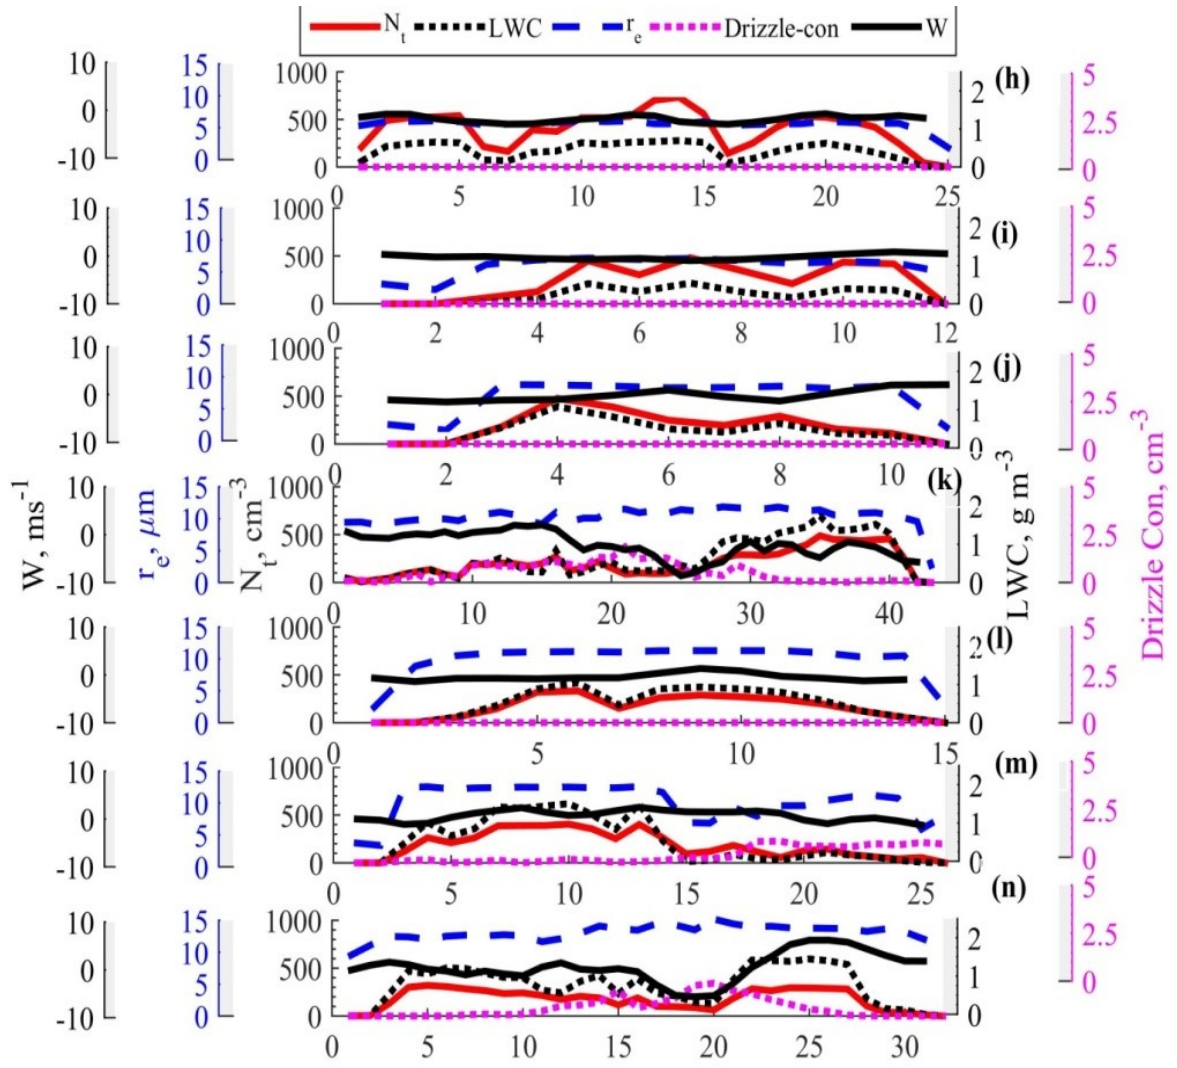

22  
 23  
 24  
 25  
 26  
 27  
 28

**Figure S4.** Same as Figure S1 but for SCL on 23 Aug 2019.

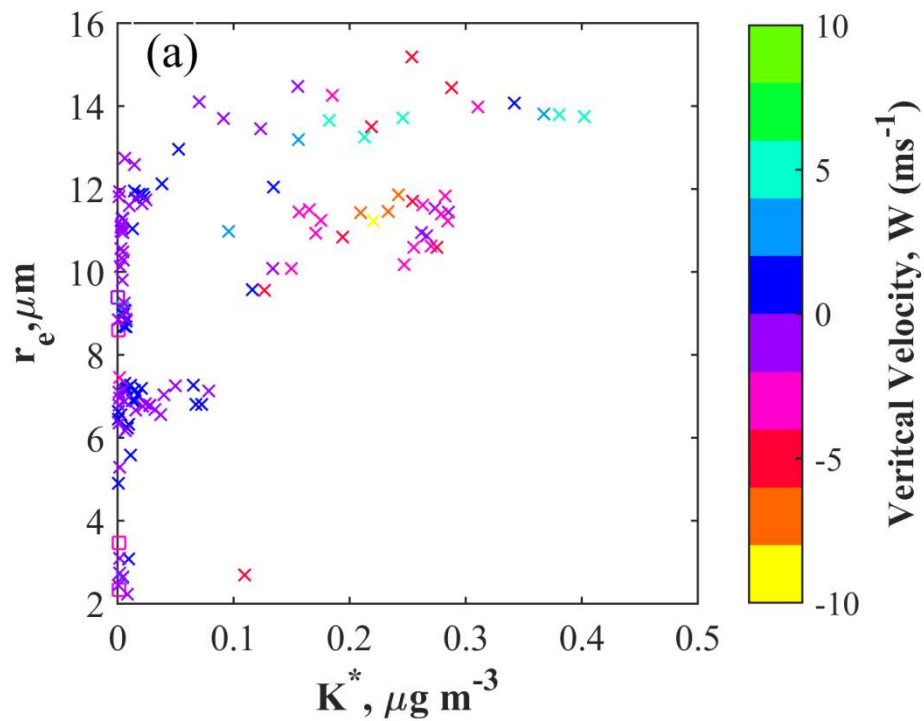

29

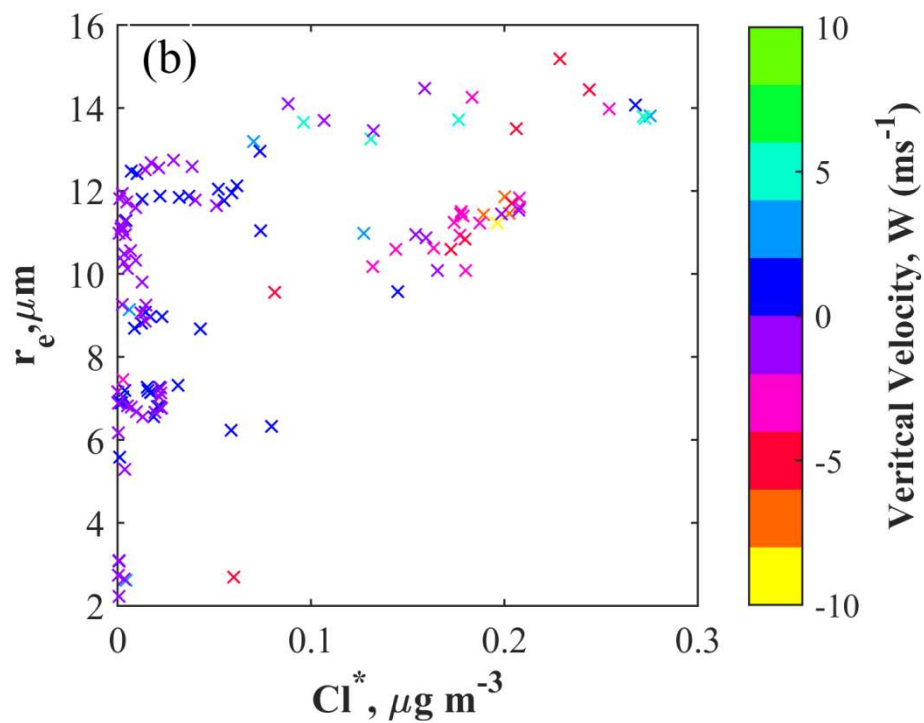

30

31

32 **Figure S5.** Scatter plot between (a) Effective radius ( $r_e$ ,  $\mu\text{m}$ ) and  $K$  ( $\mu\text{g m}^{-3}$ ), and (b)  $r_e$  versus ( $r_e$ ,  
 33  $\mu\text{m}$ ) and  $Cl$  ( $\mu\text{g m}^{-3}$ ). The colorbar indicates vertical velocity. -ve values indicate updrafts while  
 34 +ve values indicate downdrafts.

35

36

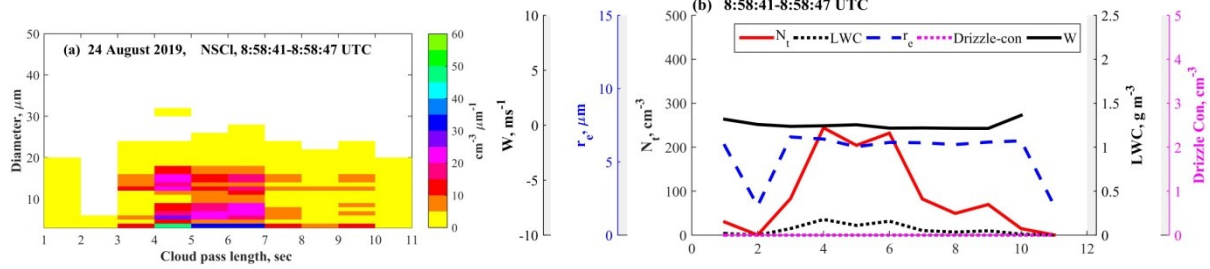

37  
 38 **Figure S6.** Same as Figure S1 but for NSCI on 24 Aug 2019. The measurement is above cloud  
 39 base.

40

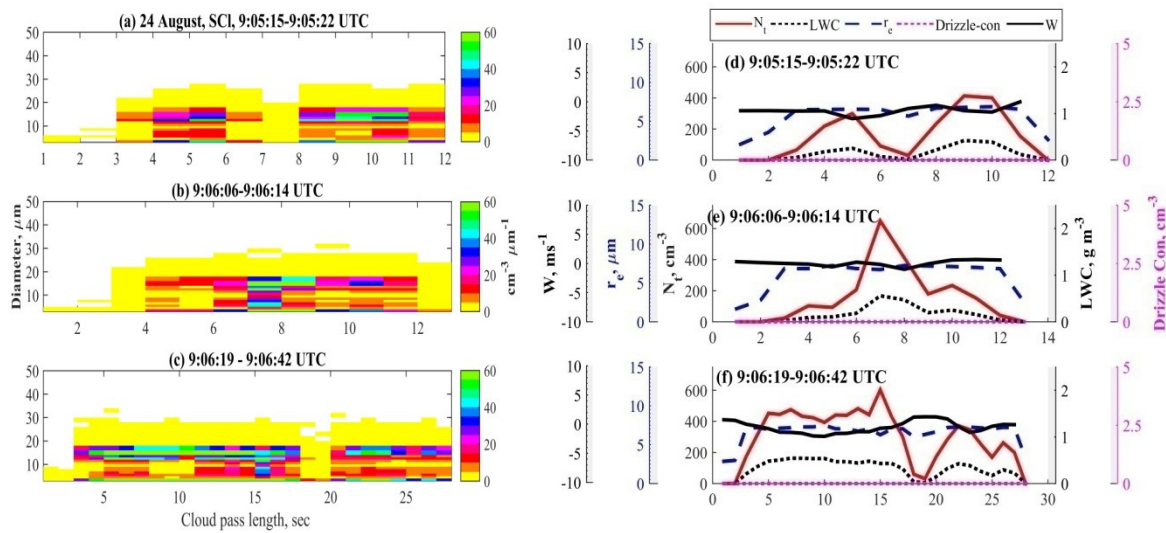

41  
 42  
 43  
 44 **Figure S7.** Same as Figure S1 but for SCI on 24 Aug 2019. The measurement is above cloud  
 45 base.

46

47

48

49

50
